# Supplementary material
Source: publisher figshare collection journal article supplement (https://future-science-group.figshare.com/ndownloader/files/34105718)
Supplement: Supplementary file 1 [file 34105718]

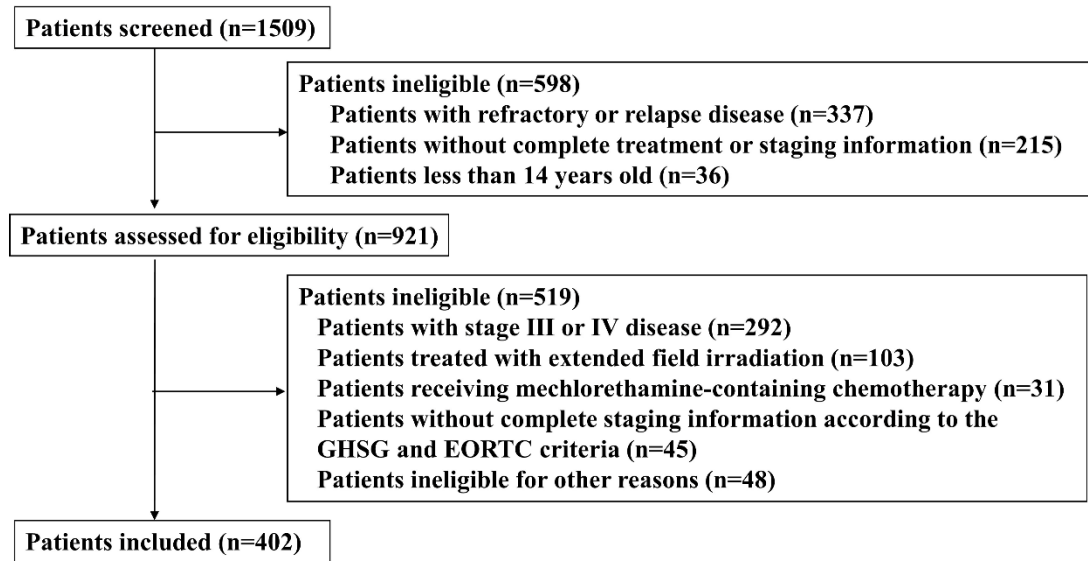

**Supplementary Figure 1. The flow chart of patient selection.**

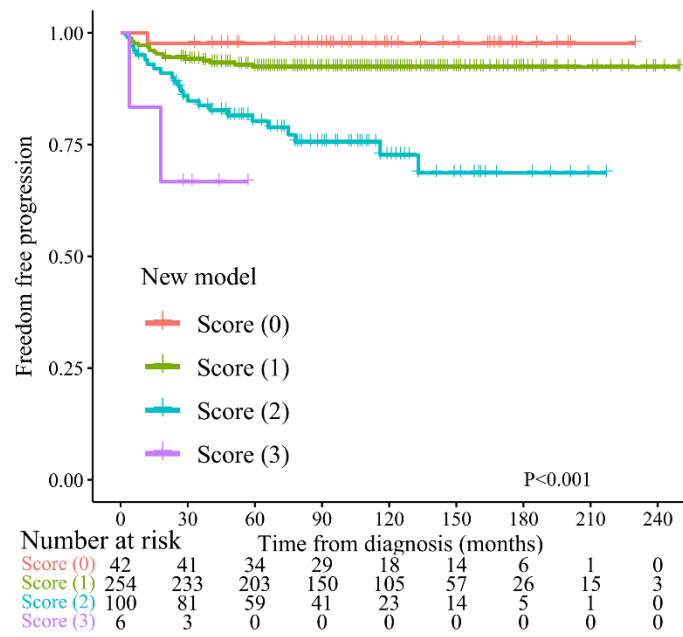

**Supplementary Figure 2.** Freedom free progression (FFP) according to the new

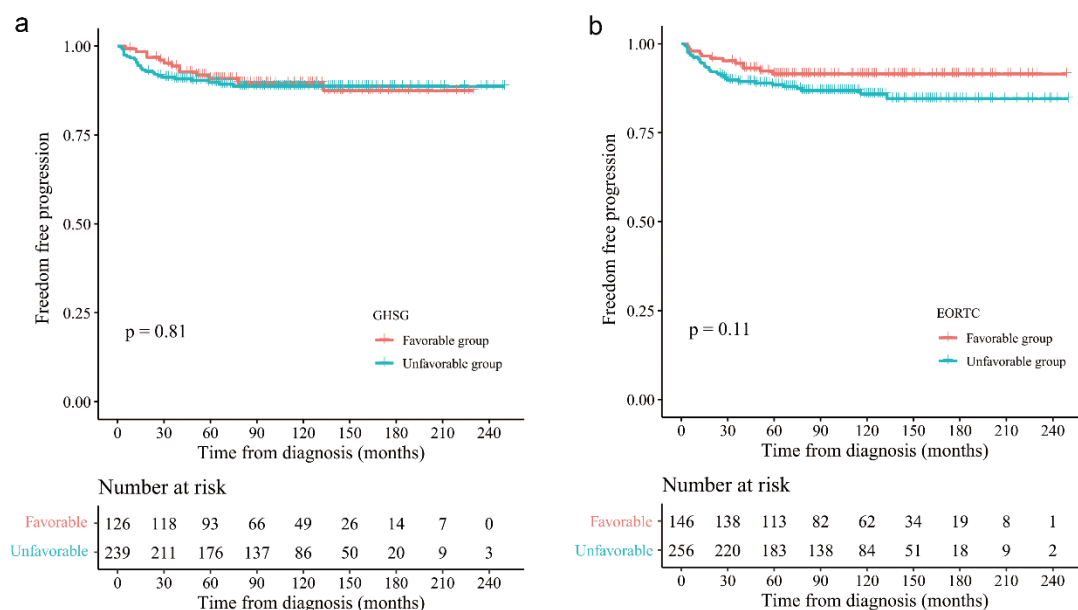

**Supplementary Figure 3.** Freedom free progression (FFP) using staging definitions of the German Hodgkin Study Group (GHSG) and the European Organization for Research (EORTC).
